# Supplementary material
Source: HighWire-hosted journal article supplement (https://n.neurology.org/content/suppl/2007/11/08/68.12.906)
Supplement: gomez_68-12-_906.pdf [file gomez_68-12-_906.pdf]

# Disminución de la colina frontal y del rendimiento neuropsicológico en la enfermedad de Huntington preclínica

B. Gómez-Ansón, MD,  
PhD, FRCR  
M. Alegret, PhD  
E. Muñoz, MD, PhD  
A. Sainz  
G.C. Monte  
E. Tolosa, MD, PhD

**RESUMEN** **Objetivos:** Estudiar las alteraciones metabólicas del cerebro en los portadores preclínicos de la enfermedad de Huntington mediante espectroscopia por resonancia magnética de protones (ERM-1H) y examinar su relación con el rendimiento neuropsicológico. **Métodos:** Se estudiaron 17 individuos con enfermedad de Huntington preclínica (EHpre) y 17 individuos control, ajustados en cuanto a edad y formación. Se realizó una ERM-1H de la corteza frontal y de los ganglios basales, así como una batería neuropsicológica que incluía pruebas de integración y velocidad visuomotoras, memoria, función ejecutiva y visuoespaciales. Los análisis estadísticos incluyeron la prueba *t* de Student y correlaciones de Pearson (nivel de significación de  $p < 0,05$ ). **Resultados:** En la EHpre se observó una disminución de los compuestos de colina (CHO) frontal [ $t(32) = -2,834, p = 0,008$ ]. Los individuos con EHpre tuvieron peores resultados que los individuos control en la prueba de 15 objetos [ $t(32) = 4,077; p < 0,000$ ], alternancias motoras de Luria [ $t(32) = -2,094, p = 0,044$ ] y pruebas de símbolos y dígitos (Symbol Digit) [ $t(32) = -2,136, p = 0,040$ ]. La disminución frontal de los CHO en la EHpre se correlacionó con el enlentecimiento de las tareas visuomotoras (prueba de 15 objetos,  $r = -0,60, p = 0,000$ ; y pruebas de símbolos y dígitos (Symbol Digit):  $r = 0,37, p = 0,047$ ). **Conclusión:** Dado que los compuestos de colina se relacionan con el recambio de la membrana, se piensa que en la corteza frontal de los portadores preclínicos de la enfermedad de Huntington se produce una disfunción de la membrana que precede a la muerte neuronal. Esta disfunción puede ser responsable de algunas de las deficiencias neuropsicológicas observadas. **NEUROLOGY 2007;68:906–910**

Los metabolitos cerebrales relacionados con diferentes poblaciones celulares pueden detectarse y cuantificarse mediante ERM<sup>1</sup>. Se han descrito alteraciones metabólicas en los ganglios basales de individuos con enfermedad de Huntington (EH)<sup>2</sup> y en un pequeño número de portadores preclínicos de la EH<sup>3–6</sup>, aunque todavía se desconoce su repercusión funcional. Algunos estudios previos han mostrado los déficit neuropsicológicos en la EHpre<sup>7–13</sup>, mientras que otros no han hallado déficit importantes<sup>14–16</sup>.

Se estudiaron las alteraciones metabólicas cerebrales en la EHpre mediante espectroscopia por resonancia magnética de protones (ERM-1H) y se examinó su relación con el rendimiento neuropsicológico. También se investigaron los cambios metabólicos en la corteza frontal y los ganglios basales que pudieran explicar los déficit neuropsicológicos en la EHpre.

**MÉTODOS.** **Sujetos.** Se estudió a 17 individuos con EHpre (10 mujeres; 7 hombres) y 17 individuos control (7 mujeres; 10 hombres), ajustados en cuanto a edad y nivel de educación. El Comité Ético de Investigación Clínica aprobó el estudio y, antes de su inclusión, todos los sujetos dieron su consentimiento detallado, informado por escrito, de todas las intervenciones.

**Evaluación clínica.** Todos los portadores de la EH carecían de manifestaciones clínicas de la enfermedad, según refirieron a ellos mismos y su familia. Un neurólogo experto realizó la evaluación clínica, que incluyó la valoración motora y funcional, la

escala de independencia y la capacidad funcional según la Unified Huntington Disease Rating Scale (UHDRS)<sup>17</sup>. El grupo de individuos control estaba formado por esposas, amigos o hermanos sin el defecto genético. Ningún individuo recibía una medicación que pudiera haber afectado su funcionamiento.

**Espectroscopia por resonancia magnética de protones.** Tres sujetos con EHpre eran claustrofóbicos y, por lo tanto, sólo se realizaron estudios de resonancia magnética (RM) en 31 individuos (14 con EHpre y 17 controles) en un aparato General Electric de 1,5 Teslas. Se obtuvieron imágenes oblicuas axiales de to-

Radiology Department, Diagnostic Imaging Center (CDI) (B. G.-A.), and Neurology Service, Institut Clínic de Neurociències (ICN) (E. M., E. T.), Hospital Clínic, IDIBAPS (B. G.-A., E. M., E. T.); Fundació ACE (M. A.), Institut Català de Neurociències Aplicades; Fundació Hospital Clínic (A. S., G. C. M.), y Universidad de Barcelona (E. M., E. T.), Barcelona, España.

**Figura 1** Imágenes axiales de resonancia magnética (RM) tridimensional que muestran la ERM-1H

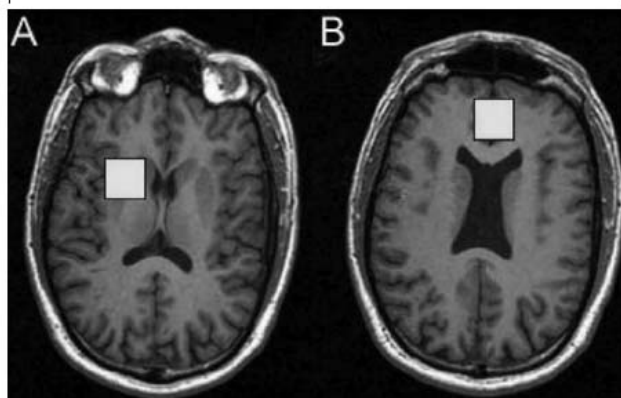

A) Ganglios basales ( $2 \times 2 \times 2$ ), incluyendo núcleo caudado y putamen.  
B) corteza frontal ( $2 \times 2 \times 2$ )

dos los pacientes con la técnica IR SPGR (Inversion Recovery Prepared Spoiled Gradient-echo) tridimensional (tiempo de eco [TE] mínimo, tiempo de inversión [TI] = 300, ángulo de basculación = 20, ancho de banda 15,63, campo de visión  $24 \times 24$ , grosor = 1,5, 128 cortes, matriz =  $256 \times 192$ , número de excitaciones [NEX] = 1) y secuencias espín eco rápidas convencionales ponderadas en DP/T2, con el fin de evaluar la anatomía cerebral, descartar patología cerebral y para propósitos de localización de la ERM. A continuación, se aplicó la técnica de espectroscopia de voxel único (EVU) (secuencia PRESS [point-resolved spectroscopy], TR [tiempo de repetición] = 6.000; TE = 30; NEX = 8) a partir de dos voxels de  $2 \times 2 \times 2$  cm de dimensión localizados en los ganglios basales y la corteza frontal (figura 1). El volumen de interés (VOI) en los ganglios basales incluyó el máximo volumen posible de la cabeza de los núcleos caudado y putamen. El VOI en la corteza frontal se localizó medialmente, en posición anterior respecto a la rodilla del cuerpo calloso. Se prestó atención de no incluir en los VOI el LCF de los ventrículos o grasa del cuero cabelludo.

En todos los casos se realizó un análisis automático y manual previo que permitió identificar todos los espectros con una calidad adecuada, según la evaluación de un observador experto (primer autor, 6 Hz o menos de anchura total a la mitad de la altura del pico de agua no suprimido y porcentajes de supresión de agua superiores al 96 %). Los datos brutos de todos los espectros se transfirieron a una estación de trabajo SUN especializada<sup>18</sup> y se posprocesaron mediante el Modelo LC. Éste es un método de referencia externa, previamente validado y automatizado, que permite la determinación de la concentración absoluta aparente de metabolitos a partir de diferentes metabolitos contenidos en un conjunto basal conocido que se utiliza como referencia, y la precisión de estos cálculos se expresa mediante la desviación estándar (DE). Los metabolitos determinados son el N-acetil-aspartato (NAA), la creatina/fosfocreatina (CRE), compuestos de colina (CHO), mioinositol (MI), glutamato (GLU), glutamina (GLN) y la suma de glutamato y glutamina (GLU+GLN). Con el fin de investigar la posible implicación del ácido gamma-aminobutírico (GABA) en la EHpre, se cuantificó la suma (GLU+GLN+GABA) considerando todos los picos combinados y comparándolos con el de (GLU+GLN). Siguiendo las recomendaciones, para este estudio se aceptaron las concentraciones de metabolitos con una DE

(proporcionada por el Modelo-LC) inferior al 20 %, a excepción del GLU y la GLN (valor de la DE inferior al 40 %).

Se realizó un «phantom» especial de NAA con el fin de calibrar el factor de calibración. Las determinaciones para este «phantom», realizadas con una periodicidad semanal mientras duró este estudio, permanecieron estables (valor medio = 0,195; DE = 1,40 %). Otros criterios de garantía de calidad a lo largo de este estudio consistieron en cinco determinaciones repetidas de EVU en un «phantom» de ERM (General Electric), llevadas a cabo cada semana, con concentraciones de metabolitos que presentarían una DE inferior al 5 %.

**Evaluación neuropsicológica.** La batería de pruebas neuropsicológicas incluyó una evaluación de las funciones visuomotoras, de memoria, frontales y visuoespaciales. La presencia de rasgos de depresión y obsesivo-compulsivos también se estudió mediante el Beck Depression Inventory<sup>19</sup> y una modificación del Leyton Obsessional Inventory<sup>20</sup>. La integración visuomotora se valoró con la prueba de 15 objetos<sup>21</sup>. Con el fin de estudiar la memoria verbal y visual declarativa, se aplicó una versión del Rey Auditory Verbal Learning Test (RAVLT)<sup>22</sup> y la prueba de la figura compleja de Rey<sup>23</sup>. Las funciones del lóbulo frontal se estudiaron mediante las alternancias motoras de Luria (número de secuencias [puño, canto, palma] realizadas correctamente durante 30 segundos con la mano dominante y la no dominante)<sup>24</sup>, la prueba de Stroop<sup>25</sup>, la prueba de rastreo (Trail Making)<sup>26</sup>, la fluidez verbal fonética (EAS)<sup>27</sup>, la fluidez verbal semántica y la prueba aritmética de la Wechsler Adult Intelligence Scale (WAIS)-III. La velocidad visuomotora se determinó mediante la prueba de Stroop (pruebas de lectura y denominación), la prueba Trail Making A y la pruebas de símbolos y dígitos (Symbol Digit) de WAIS-III. Finalmente, las funciones visuoespaciales se evaluaron con la prueba Benton's Judgment of Line Orientation<sup>28</sup>.

**Análisis estadístico.** Se realizó el análisis estadístico mediante el programa SPSS (versión 11.0 para PC). Las diferencias entre grupos se estudiaron mediante la prueba *t* de Student. El análisis de la varianza de medidas repetidas se utilizó para comparar el funcionamiento entre grupos según las pruebas de 15 objetos y RAVLT. Los datos de ERM y neuropsicológicos para los que se halló una diferencia significativa entre grupos se correlacionaron entre ellos mediante el análisis de correlación de Pearson. Se aplicaron correcciones para comparaciones múltiples mediante el método de Bonferroni. El nivel de significación se fijó en  $p \leq 0,05$ .

**RESULTADOS.** Características de las muestras. La media y la desviación estándar de la edad de los grupos de individuos con EHpre y control fueron  $33,8 \pm 9,6$  y  $33,9 \pm 7$  años, respectivamente. El número de repeticiones CAG en el grupo de EHpre (media y DE) ascendió a  $43,68 \pm 2,44$ , con un rango de 41 a 49. Las puntuaciones en la escala motora de la UHDRS fueron normales en nueve individuos con EHpre, y levemente anómalas, aunque no indicaban enfermedad, en ocho individuos (puntuación motora de la UHDRS  $\leq 5$  en siete individuos y  $< 10$  en un individuo). No se observaron movimientos coreiformes en ningún individuo con EHpre, pero en tres de ellos se detectaron movimientos de los dedos ligeros, sutiles y muy ocasionales mientras caminaban. En dos casos se observaron sacudidas durante el seguimiento ocular, en

| Localización de la ERM-1H | Metabolitos              | EHpre, media (DE) | Control, media (DE) | t (32) | p      |
|---------------------------|--------------------------|-------------------|---------------------|--------|--------|
| Ganglios basales          | NAA                      | 9,58 (1,57)       | 9,99 (1,02)         | -0,867 | 0,393  |
|                           | CRE                      | 7,01 (1,03)       | 7,48 (1,10)         | -1,202 | 0,239  |
|                           | CHO                      | 1,53 (0,26)       | 1,54 (0,29)         | -0,085 | 0,933  |
|                           | INO                      | 3,93 (0,61)       | 4,50 (0,93)         | -1,934 | 0,063  |
|                           | GLU                      | 8,82 (1,08)       | 8,99 (2,05)         | -0,261 | 0,796  |
|                           | GLN                      | 5,27 (1,64)       | 5,69 (1,85)         | -0,553 | 0,587  |
|                           | (GLU+GLN+GABA)-(GLU+GLN) | 0,24 (0,34)       | 0,26 (0,28)         | -0,17  | 0,869  |
| Frontal                   | NAA                      | 8,92 (1,48)       | 9,69 (1,45)         | -1,440 | 0,161  |
|                           | CRE                      | 6,36 (1,07)       | 6,91 (0,94)         | -1,522 | 0,139  |
|                           | CHO                      | 1,26 (0,22)       | 1,54 (0,30)         | -2,834 | 0,008* |
|                           | INO                      | 4,29 (0,91)       | 5,02 (1,09)         | -1,946 | 0,062  |
|                           | GLU                      | 9,14 (2,29)       | 10,47 (2,01)        | -1,688 | 0,103  |
|                           | GLN                      | 5,50 (1,17)       | 5,41 (4,79)         | 0,040  | 0,969  |
|                           | (GLU+GLN+GABA)-(GLU+GLN) | 0,33 (0,29)       | 0,45 (0,38)         | -0,91  | 0,372  |

\*p < 0,01

DE = desviación estándar; NAA = N-acetil-aspartato; CRE = creatina/fosfocreatina; CHO = compuestos de colina; INO = mioinositol; GLU = glutamato; GLN = glutamina; GABA = ácido gamma-aminobutírico.

un caso un aumento de la latencia en el inicio del movimiento sacádico y en otro caso una leve disminución de la velocidad del movimiento sacádico. En cuatro pacientes se comprobó un leve entecimiento en el *tapping* de los dedos con la mano izquierda y en tres pacientes un ligero entecimiento en la prueba de pronación y supinación con la mano no dominante. Se observó una discreta rigidez unilateral en extremidades superiores en dos casos. En ningún individuo con EHpre se detectó disartria, anomalías en la protrusión lingual, bradicinesia axial, distonía o alteraciones en las pruebas de marcha, tándem y retropulsión.

Tres sujetos con EHpre, sin diferencias con respecto al resto, no pudieron someterse a la resonancia magnética debido a que sufrían claustrofobia. Uno de ellos obtuvo una puntuación 0 en la escala motora de la UHDRS y los otros dos padecían alteraciones leves que no eran concluyentes respecto a la presentación de la enfermedad. La escala de independencia, la evaluación funcional y la capacidad fueron normales en todos los individuos con EHpre.

**Alteraciones metabólicas cerebrales.** Los datos de ERM-1H obtenidos en 14 individuos con EHpre y 17 individuos control, y las comparaciones respectivas, se exponen en la tabla 1. Los individuos con EHpre presentaban valores de CHO frontal inferiores a los de individuos control ( $1,26 \pm 0,22$  frente a

$1,54 \pm 0,30$ ,  $p = 0,008$ ), diferencia que se mantuvo después de las correcciones para las comparaciones múltiples. La figura E-1 disponible *online* ([www.neurology.org](http://www.neurology.org)) ilustra espectros frontales representativos de sujetos con EHpre y control.

**Rendimiento neuropsicológico.** En la tabla 2 se describen los resultados del rendimiento neuropsicológico y de las comparaciones realizadas. Se observaron diferencias (funcionamiento peor o más lento en los individuos con EHpre) en la prueba de 15 objetos ( $p = 0,000$ ), alternancias motoras de Luria con la mano dominante ( $p = 0,044$ ) y prueba de símbolos y dígitos (Symbol Digit) ( $p = 0,040$ ). Las diferencias en la prueba de 15 objetos permanecieron significativas tras la corrección para comparaciones múltiples. Los resultados de la prueba de 15 objetos se correlacionaron tanto con la prueba de Luria ( $R = -0,482$ ,  $p = 0,003$ ) como con la de símbolos y dígitos (Symbol Digit) ( $R = -0,59$ ,  $p = 0,000$ ).

Las puntuaciones de depresión fueron las siguientes: normal (de 0 a 9) (15 individuos con EHpre y 14 control); leve (de 10 a 15) (2 individuos con EHpre y 2 control); moderada (de 16 a 19) (0 individuos con EHpre y 0 control); moderada/grave (de 20 a 29) (0 individuos con EHpre y 1 control). Además, no existió correlación entre la depresión y la puntuación en la prueba de 15 objetos, alternancias motoras de Luria y prueba de símbolos y dígitos.

| Prueba                                            | EHpre, media (DE) | Control, media (DE) | t (32) | p                  |
|---------------------------------------------------|-------------------|---------------------|--------|--------------------|
| Prueba de 15 objetos (segundos)                   | 69,41 (23,04)     | 45,29 (8,00)        | 4,077  | 0,000 <sup>a</sup> |
| RAVLT (todos los ensayos)                         | 52,41 (7,80)      | 50,41 (8,26)        | 0,726  | 0,473              |
| Figura compleja de Rey                            | 22,71 (5,39)      | 24,41 (5,32)        | -0,929 | 0,360              |
| Alternancias motoras de Luria (mano dominante)    | 24,41 (6,28)      | 28,47 (4,94)        | -2,094 | 0,044 <sup>b</sup> |
| Alternancias motoras de Luria (mano no dominante) | 23,59 (5,33)      | 26,18 (8,19)        | -1,092 | 0,283              |
| Alternancias motoras de Luria (derecha+izquierda) | 48,00 (11,40)     | 54,65 (11,90)       | -1,66  | 0,106              |
| Interferencia de Stroop                           | 35,18 (9,28)      | 36,74 (9,15)        | -0,495 | 0,624              |
| Trail Making B                                    | 68,35 (28,08)     | 63,88 (13,37)       | 0,593  | 0,558              |
| Fluidez verbal fonética                           | 35,41 (12,17)     | 38,76 (8,90)        | -0,917 | 0,366              |
| Fluidez verbal semántica                          | 39,59 (10,04)     | 41,20 (5,31)        | -0,577 | 0,569              |
| WAIS-III (aritmética)                             | 13,18 (3,03)      | 13,82 (2,83)        | -0,644 | 0,524              |
| Stroop (lectura)                                  | 98,35 (18,52)     | 109,41 (17,17)      | -1,805 | 0,080              |
| Stroop (denominación)                             | 67,94 (11,94)     | 73,76 (10,16)       | -1,532 | 0,135              |
| Trail Making A                                    | 34,65 (19,62)     | 28,94 (15,51)       | 0,941  | 0,354              |
| WAIS III Symbol Digit (símbolos y dígitos)        | 71,00 (16,96)     | 81,00 (9,21)        | -2,136 | 0,040 <sup>b</sup> |
| Judgment of Line Orientation                      | 24,00 (5,42)      | 23,41 (4,43)        | 0,346  | 0,731              |
| Beck Depression Questionnaire                     | 3,47 (4,66)       | 4,65 (5,28)         | -0,689 | 0,496              |
| Leyton                                            | 36,41 (23,24)     | 34,06 (15,52)       | 0,347  | 0,731              |

<sup>a</sup>p < 0,001.

<sup>b</sup>p < 0,05.

RAVLT = Rey Auditory Verbal Learning Test; WAIS = Wechsler Adult Intelligence Scale.

**Correlación entre la ERM-1H y el rendimiento neuropsicológico.** Se observó una correlación entre la CHO frontal y los resultados de las pruebas de 15 objetos (segundos necesarios para realizar la tarea;  $R = -0,60$ ;  $p = 0,000$ ) (que se mantuvo después de las rectificaciones para comparaciones múltiples) y de símbolos y dígitos ( $r = 0,37$ ;  $p = 0,047$ ).

**COMENTARIO.** Se estudiaron las alteraciones metabólicas cerebrales (ERM-1H) y el funcionamiento neuropsicológico en 14 individuos con EHpre frente a 17 individuos control. Se detectó una disminución de la CHO frontal en los individuos con EHpre, que presentaron unos peores resultados que los individuos control en las tareas visuomotoras y premotoras. La reducción de la CHO frontal se correlacionó con un mal rendimiento neuropsicológico según las pruebas de 15 objetos y de símbolos y dígitos.

Un estudio previo de ERM sobre los ganglios basales en la EH precoz<sup>2</sup> detectó un individuo presintomático sin alteraciones. Otro estudio de los ganglios basales incluyó dos individuos asintomáticos (uno con síntomas leves) y halló una disminución en la proporción de NAA respecto a CRE<sup>4</sup>. Los resultados no

son comparables debido a las diferencias metodológicas entre estos estudios y el actual. También se ha descrito una elevación de los valores de lactato en los ganglios basales y la corteza occipital<sup>3</sup> y frontal, sin deterioro neuronal<sup>6</sup>, en la EHpre. Recientemente, se ha descrito en la EHpre una disminución de la CRE putaminal y una gran heterogeneidad de las alteraciones en la ERM-1H<sup>5</sup>. Nuestro estudio incluyó espectros de alta calidad de la corteza frontal y los ganglios basales, así como concentraciones absolutas de metabolitos. La utilización de concentraciones absolutas de metabolitos presenta ventajas frente a valores expresados en cociente respecto a la CRE, en los que debe suponerse una concentración estable de esta última. Los estudios anteriores de ERM del cerebro de pacientes con EM han demostrado que la CRE no es estable a lo largo de todo el proceso metabólico y, por lo tanto, se cuestiona la validez de emplear los cocientes en la ERM-1H practicada *in vivo*<sup>29</sup>.

Cada metabolito proporciona una información celular y neuropatológica distinta<sup>1</sup>. La NAA es un marcador neuronal, la CRE está relacionada con el metabolismo celular, la CHO con permeabilidades recambio de la membrana y el inositol (INO) con las

poblaciones gliales<sup>30</sup>, mientras que el GLU, la GLN y el GABA forman parte de la cascada neurotóxica y excitotóxica. En el presente trabajo, la NAA y la CRE permanecieron inalteradas en la EHpre, lo que indicaba que la muerte neuronal y la disfunción metabólica todavía no se habían producido o eran indetectables. Estos resultados concuerdan con la observación de que, en los modelos animales transgénicos y *knock-in* de la EH, las alteraciones motoras y cognitivas aparecen en ausencia de una pérdida neuronal apreciable<sup>31</sup>. Este hecho hace pensar que las alteraciones funcionales pueden preceder a la muerte neuronal tanto en los modelos animales como en los seres humanos. En esta investigación, la disminución de la CHO en la EHpre apunta a una alteración del recambio de la membrana, que puede dar lugar a alteraciones en la conducción axonal y a peores rendimientos neuropsicológicos. Existen evidencias neuropatológicas de afectación de oligodendrocitos en el cerebro de los individuos con EHpre<sup>32</sup>. Esta observación respalda la hipótesis de que la afectación oligodendrial no es una consecuencia de la muerte neuronal, sino que puede reflejar las anomalías constitucionales del desarrollo cerebral en los portadores de la EH. Puesto que los oligodendrocitos intervienen en el recambio de la membrana, la demostración en este estudio de una disminución de CHO frontal apunta a la existencia de una disfunción en estas células en la EH. La afectación glial en la EH también se ha descrito en los estudios de ERM del LCR<sup>33</sup>. Finalmente, se halló que el GLU, la GLN y el GABA permanecían inalterados en la EHpre, lo que indica que posiblemente no existen cambios o éstos son indetectables.

Se descubrieron algunas alteraciones en las pruebas neuropsicológicas de los individuos con EHpre: un peor resultado en las tareas de integración visuomotora (prueba de 15 objetos), de secuenciación motora (alternancias motoras de Luria) y pruebas visuomotoras (símbolos y dígitos). Se sabe que la prueba de 15 objetos da resultados anómalos en la enfermedad de Parkinson (EP), con independencia de los sistemas dopaminérgicos<sup>21,34</sup>. Los datos del presente estudio concuerdan con las descripciones sobre la alteración del procesamiento visual en fases iniciales de la EH sintomática<sup>35</sup>, así como con la propuesta de que esta prueba sea un biomarcador precoz sensible en la EH<sup>36,39</sup>. También encontramos un peor rendimiento de los individuos con EHpre respecto a individuos control en la prueba de símbolos y dígitos, como ya han descrito otros autores<sup>11,40</sup>. Más aún, descubrimos que las puntuaciones de las pruebas de 15 objetos y de símbolos y dígitos se encontraban claramente relacionadas, lo que corrobora los resultados anterior-

res. Finalmente, los individuos con EHpre realizaron peor la prueba de alternancias motoras de Luria que los individuos control, hecho que ya había sido descrito con anterioridad<sup>41</sup>.

Es posible que existan ciertas limitaciones en la presente investigación. En primer lugar, el número de individuos incluidos no es elevado. En segundo lugar, no puede descartarse la atrofia cortical, descrita en la EH precoz<sup>42</sup> y en las fases preclínicas de la EH<sup>43</sup>, así como los efectos del volumen en el vóxel frontal. Finalmente, puede ser necesaria una ERM *in vivo*<sup>44</sup> más específica para caracterizar la implicación del ciclo de glutamato/glutamina y los potenciales procesos adaptativos presentes en las fases preclínicas de la EH.

#### AGRADECIMIENTO

Los autores agradecen al doctor M. McLean (Institute of Neurology, Queen Square, London) por su ayuda con el Modelo LC, a los individuos participantes y al equipo técnico de RM (A. Martín y J. Subirana).

#### REFERENCIAS BIBLIOGRÁFICAS

1. Urenjak J, Williams SR, Gadian DG, Noble M. Proton nuclear magnetic resonance spectroscopy unambiguously identifies different neural cell types. *J Neurosci* 1993;13:981-989.
2. Taylor-Robinson SD, et al. Proton magnetic resonance spectroscopy in Huntington's disease: evidence in favour of the excitotoxic theory? *Mov Disord* 1996;11:167-173.
3. Jenkins BG, Rosas HD, Chen YC, et al. 1H NMR spectroscopy studies of Huntington's disease: correlations with CAG repeat numbers. *Neurology* 1998;50:1357-1365.
4. Sánchez-Pernaute R, García-Segura JM, del Barrio Alba A, Víaño J, de Yébenes JG. Clinical correlation of striatal <sup>1</sup>H MRS changes in Huntington's disease. *Neurology* 1999;53:806-812.
5. Reynolds NC Jr, Prost RW, Mark LP. Heterogeneity in <sup>1</sup>H-MRS profiles of presymptomatic and early manifest Huntington's disease. *Brain Res* 2005;1031:82-89.
6. Harms L, Meierkord H, Timm G, Pfeiffer L, Ludolph AC. Decreased N-acetyl-aspartate/choline ratio and increased lactate in the frontal lobe of patients with Huntington's disease: a proton magnetic resonance spectroscopy study. *J Neurosci Res* 2000;779-782.
7. Muller SV, Jung A, Preinfalk J, et al. Disturbance of 'extrinsic alertness' in Huntington's disease. *J Clin Exp Neuropsychol* 2002;24:517-526.
8. Georgiou N, Bradshaw JL, Philips JG, Chiu E. The effect of Huntington's disease and Gilles de la Tourette's syndrome on the ability to hold and shift attention. *Neuropsychologia* 1996;34:843-851.
9. Lawrence AD, Weeks RA, Brooks DJ, et al. The relationship between striatal dopamine receptor binding and cognitive performance in Huntington's disease. *Brain* 1998;121:1343-1355.
10. Diamond R, White RE, Myers RH, et al. Evidence of presymptomatic cognitive decline in Huntington's disease. *J Clin Exp Neuropsychol* 1992;14:961-975.
11. Foroud T, Siemers E, Kleindorfer D, et al. Cognitive scores in carriers of Huntington's disease gene compared to non-carriers. *Ann Neurol* 1995;37:657-664.

12. Lundervold AJ, Reinvang I. Variability in cognitive function among persons at high genetic risk of Huntington's disease. *Acta Neurol Scand* 1995;91:462-469.
13. Jason GW, Pajurkova EM, Suchowersky O, et al. Presymptomatic neuropsychological impairment in Huntington's disease. *Arch Neurol* 1988;45:769-773.
14. Rothlind JC, Brandt J, Zee D, Codori AM, Folstein S. Unimpaired verbal memory and oculomotor control in asymptomatic adults with the genetic marker for Huntington's disease. *Arch Neurol* 1993;50:799-802.
15. Campodonico JR, Codori AM, Brandt J. Neuropsychological stability over two years in asymptomatic carriers of the Huntington's disease mutation. *J Neurol Neurosurg Psychiatry* 1996;61:621-624.
16. De Boo GM, Tibben A, Lanser JB, et al. Early cognitive and motor symptoms in identified carriers of the gene for Huntington disease. *Arch Neurol* 1997;54:1353-1357.
17. Huntington Study Group. Unified Huntington's Disease Rating Scale: reliability and consistency. *Mov Disord* 1996;11:136-142.
18. Provencher SW. Estimation of metabolite concentrations from localized in vivo proton NMR spectra. *Magn Reson Med* 1993;30:672.
19. Beck AT, Ward CH, Mendelson M, et al. An inventory for measuring depression. *Arch Gen Psychiatry* 1961;4:561-571.
20. Frankel M, Cummings JL, Robertson MM, Trimble MR, Hill MA, Benson DE. Obsessions and compulsions in Gilles de la Tourette's syndrome. *Neurology* 1986;36:378-382.
21. Pillon B, Dubois B, Bonnet AM, et al. Cognitive slowing in Parkinson's disease fails to respond to levodopa treatment: The 15-Objects test. *Neurology* 1989;39:762-768.
22. Rey A. *l'Examen Clinique en Psychologie*. Paris, France: Presses Universitaires de France, 1964.
23. Lezak MD. *Neuropsychological Assessment*, 3rd ed. New York, NY: Oxford University Press, 1995.
24. Christensen AL. *Luria's Neuropsychological Investigation*. Copenhagen, Denmark: Munksgaard International Publishers, 1979.
25. Golden CJ. *Stroop Color and Word Test*. Chicago, IL: Stoelting, 1978.
26. Reitan RM, Davison LA. *Clinical Neuropsychology: Current Status and Applications*. New York: Hemisphere, 1974.
27. Benton AL, Hamsher KS. *Multilingual Aphasia Examination*. Iowa City: Iowa AJA Associates, 1989.
28. Benton AL, Varney NR, Hamsher KS. Visuospatial judgment: a clinical test. *Arch Neurol* 1978;35:364-367.
29. Davies SE, Newcombe J, Williams SR, McDonald WI, Clark JB. High resolution proton NMR spectroscopy of multiple sclerosis lesions. *J Neurochem* 1995;64:742-748.
30. Gutowski NJ, Gómez-Ansón B, Torpey N, Revesz T, Miller D-H, Rudge P. Oligodendroglial gliomatosis cerebri: 1H-MRS suggests elevated glycine/inositol levels. *Neuroradiology* 1999;41:650-653.
31. Hickey MA, Chesseler ME. The use of transgenic and knock-in mice to study Huntington's disease. *Cytogenet Genome Res* 2003;100:276-286.
32. Gómez-Tortosa E, MacDonald ME, Friend C, et al. Quantitative neuropathological changes in presymptomatic Huntington's disease. *Ann Neurol* 2001;49:29-34.
33. Garseth M, Sonnewald U, White LR, et al. Proton magnetic resonance spectroscopy of cerebrospinal fluid in neurodegenerative disease: indication of glial energy impairment in Huntington chorea, but not Parkinson disease. *J Neurosci Res* 2000;60:779-782.
34. Alegret M, Vendrell P, Junqué C, et al. Effects of unilateral posteroventral pallidotomy on 'on-off' cognitive fluctuations in Parkinson's disease. *Neuropsychologia* 2000;38:628-633.
35. Gómez-Tortosa E, Barrio A, Barroso T, García Ruiz PJ. Visual processing disorders in patients with Huntington's disease and asymptomatic carriers. *J Neurol* 1996;243:286-292.
36. Blekher TM, Yee RD, Kirkwood SC, et al. Oculomotor control in asymptomatic and recently diagnosed individuals with the genetic marker for Huntington's disease. *Vision Res* 2004;44:2729-2736.
37. Siemers E, Foroud T, Bill DJ, et al. Motor changes in presymptomatic Huntington disease gene carriers. *Arch Neurol* 1996;53:487-492.
38. Penney JB, Young BM, Shoulson I, et al. Huntington's disease in Venezuela: 7 years of follow-up on symptomatic and asymptomatic individuals. *Mov Disord* 1990;5:93-99.
39. Kirkwood SC, Siemers E, Hodes ME, Conneally PM, Christian JC, Foroud T. Subtle changes among presymptomatic carriers of the Huntington's disease gene. *J Neurol Neurosurg Psychiatry* 2000;69:773-779.
40. O'Donnell BF, Wilt MA, Hake AM, Stout JC, Kirkwood SC, Foroud T. Visual function in Huntington's disease patients and presymptomatic gene carriers. *Mov Disord* 2003;18:1027-1034.
41. Bartenstein P, Weindl A, Spiegel S, et al. Central motor processing in Huntington's disease. A PET study. *Brain* 1997;120:1553-1567.
42. Rosas HD, Liu AK, Hersch S, et al. Regional and progressive thinning of the cortical ribbon in Huntington's disease. *Neurology* 2002;58:695-701.
43. Rosas HD, Hevelone ND, Zaleta AK, Greve DN, Salat DH, Fischl B. Regional cortical thinning in preclinical Huntington disease and its relationship to cognition. *Neurology* 2005;65:745-747.
44. García-Espinosa MA, Rodríguez TB, Sierra A, et al. Cerebral glucose metabolism and the glutamine cycle as detected by in vivo and in vitro NMR spectroscopy. *Neurochem Int* 2004;45:297-303.
